# Supplementary material for: Scandia-doped zirconia for the electrochemical detection of hazardous dihydroxybenzene (DHB) isomers in water
Source: Royal Society of Chemistry journal article supplement (doi:10.1039/d4va00126e), 2024-01-01
Supplement: d4va00126e1.pdf [file d4va00126e1.pdf]

## Scandia-doped zirconia for the electrochemical detection of hazardous dihydroxybenzene isomers in water

A. Ferlazzo<sup>\*a,b</sup>, A. Gulino<sup>a,b</sup>, G. Neri<sup>\*c</sup>.

<sup>a</sup>Department of Chemical Sciences, University of Catania, Viale Andrea Doria 6, 95125 Catania, Italy

<sup>b</sup>INSTM UdR of Catania, Viale Andrea Doria 6, 95125 Catania, Italy

<sup>c</sup>Department of Engineering, University of Messina, C.da Di Dio, I-98166 Messina, Italy

\* Corresponding author: [angelo.ferlazzo@unict.it](mailto:angelo.ferlazzo@unict.it); [gneri@unime.it](mailto:gneri@unime.it);

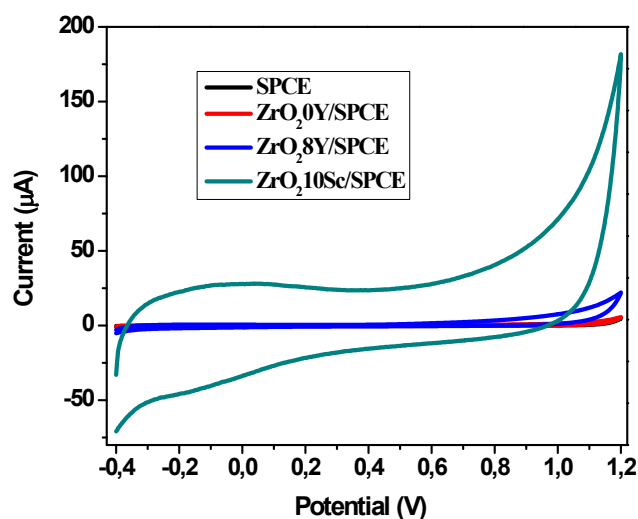

**Fig. S1.** Electrochemical behavior using CV in 0.01 M PBS at a scan rate of 50 mV/s of the SPCE, ZrO<sub>2</sub>.0Y/SPCE, ZrO<sub>2</sub>.8Y/SPCE and ZrO<sub>2</sub>.10Sc/SPCE sensor in the -0.4 – 1.2 V potential window.

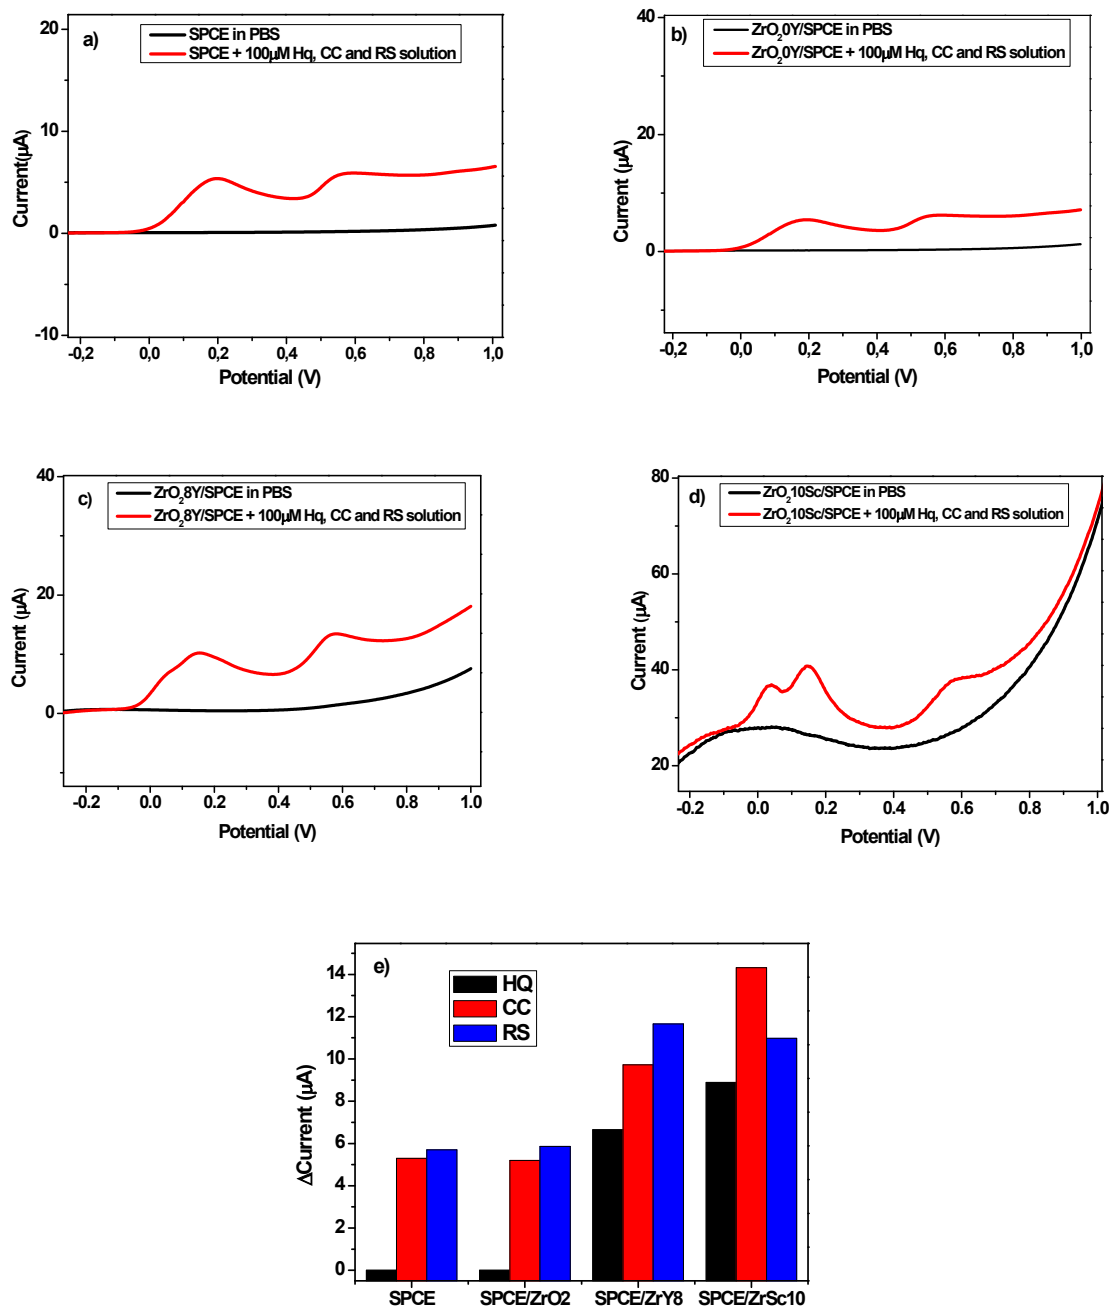

**Fig. S2.** Linear sweep voltammetry (LSV) behavior of 100  $\mu\text{M}$  HQ, RS and CC in 0.01 M PBS at a scan rate of 50 mV/s with: a) SPCE, b) ZrO<sub>2</sub>0Y/SPCE, c) ZrO<sub>2</sub>8Y/SPCE, and d) ZrO<sub>2</sub>10Sc/SPCE in the -0.4 –

1.2 V potential window. e) Variation of the anodic peak current for the three DHB isomers registered with the sensors tested.

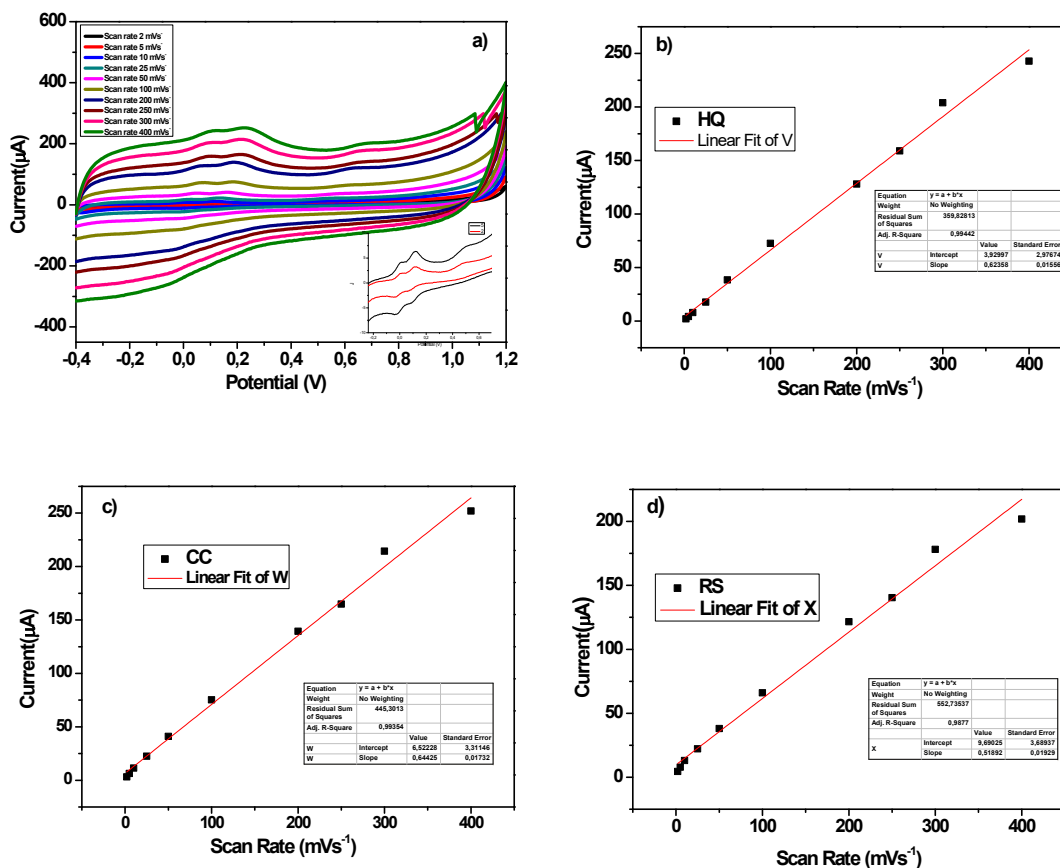

**Fig. S3.** a) Cyclic voltammograms of  $ZrO_2/10Sc/SPCE$  in a solution containing  $100 \mu M$  HQ, CC e RS in PBS at  $pH=7.4$  at scan rates from 2 to 400  $mV/s$ . The inset shows the variation using the scan rate of 2 and 6  $mV/s$ ; The variation of baseline-corrected anodic peak currents ( $I_{pa}$ ) as a function of scan rate (b) HQ, (c) CC and (d) RS is shown.

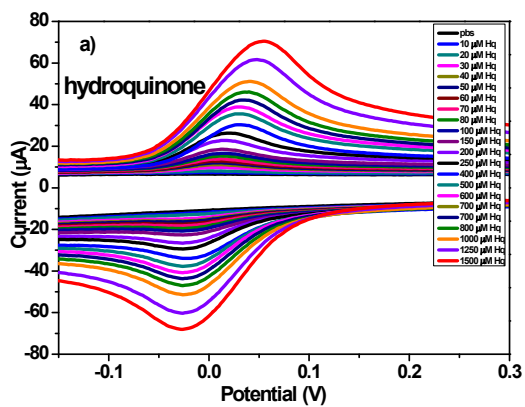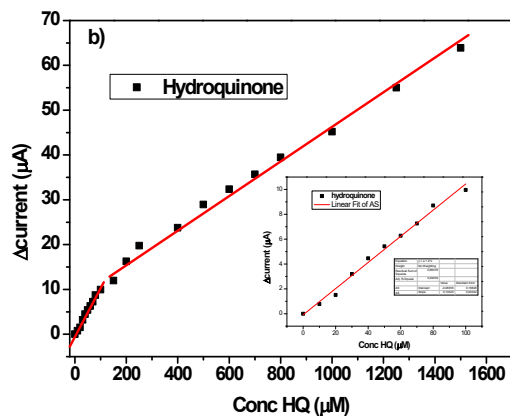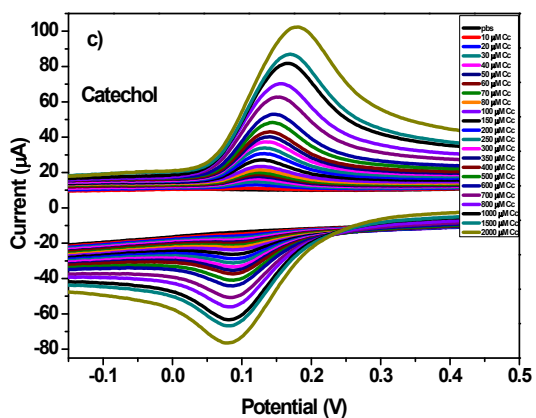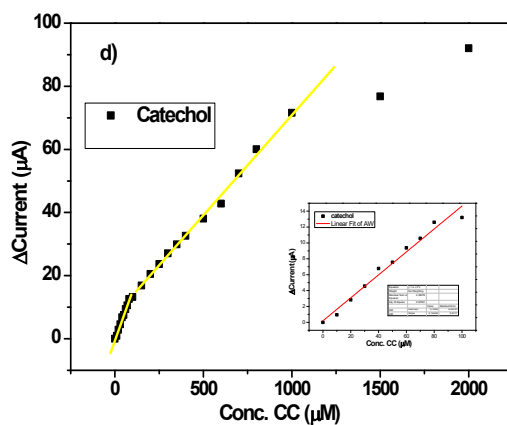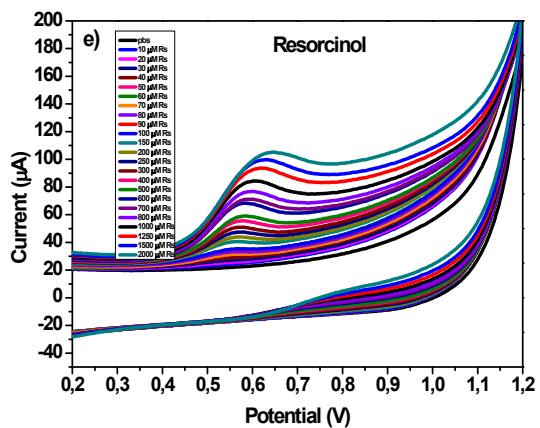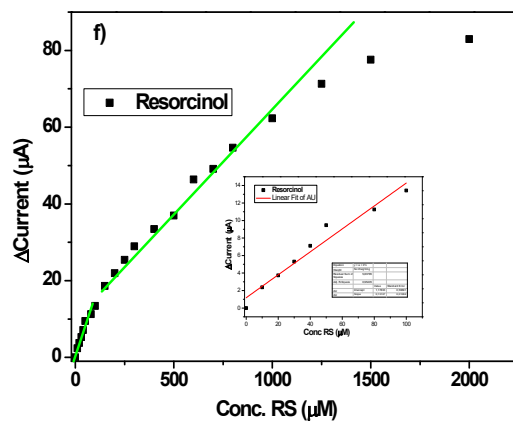

**Fig. S4.** CV of (a) HQ, (c) CC and (e) RS standard solutions with increasing concentrations from 0 to 2000  $\mu\text{M}$  of analytes recorded in a 0.01 M PBS of  $\text{pH} = 7.4$  using  $\text{ZrO}_2/\text{SPCE}$ . Calibration graphs for peak currents (baseline corrected) as a function of analyte concentrations of (b) HQ, (d) CC, and (f) RS.
